# Supplementary material
Source: Springer Nature journal article supplement (https://www.springermedizin.de/resource/supplementary/12885_2014_4817_MOESM7_ESM.pdf/9467446)

chr10:131,155,100  
CpG site 1

Miseq sequencing

MSP

Exon1

chr10:131,155,761  
77

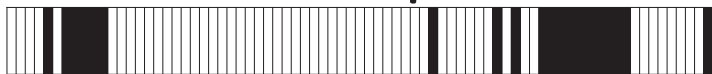

Methylation percentage on average

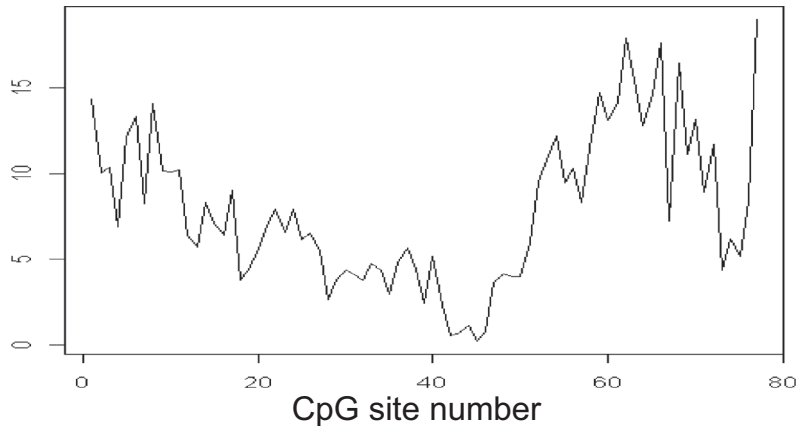

Supplement: MOESM7 [file 9467446]
